# Supplementary material for: The circular RNA Cdr1as, via miR-7 and its targets, regulates insulin transcription and secretion in islet cells
Source: PubMed Central journal article supplement (PMC4515639; doi:10.1038/srep12453), 2015-07-27
Supplement: srep12453-s1.pdf [file srep12453-s1.pdf]

## **Supplementary information files**

### **The circular RNA *Cdr1as*, via miR-7 and its targets, regulates insulin transcription and secretion in islet cells**

Huanyu Xu,<sup>1\*</sup> Sen Guo,<sup>1</sup> Wei Li,<sup>2</sup> Ping Yu,<sup>1\*</sup>

<sup>1</sup>Institute of Genomic Medicine, Wenzhou Medical University, Zhejiang, China, <sup>2</sup>Zhejiang Provincial Key Laboratory of Medical Genetics; School of Laboratory Medicine & Life Sciences, Wenzhou Medical University, Zhejiang, China

#### **Corresponding author**

Ping Yu, and Huanyu Xu;

Institute of Genomic Medicine, Wenzhou Medical University, Zhejiang province, China;

Phone: +86 159-8878-1270; Fax: +86-577-86699399

E-mail: [jyzwzy@gmail.com](mailto:jyzwzy@gmail.com) and [xuhuanyu1979@gmail.com](mailto:xuhuanyu1979@gmail.com)

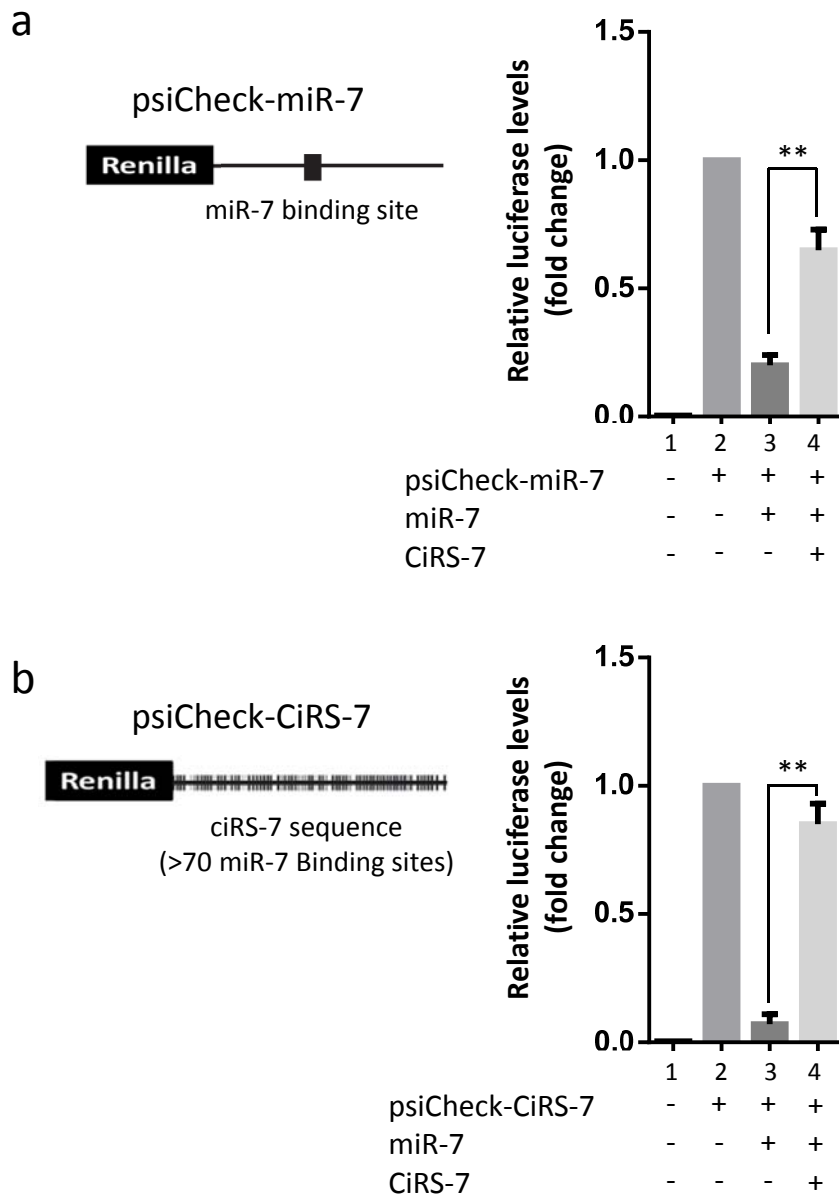

**Supplementary Fig. 1** Physical interaction of *Cdr1as* and miR-7 in islet cells. **(a)** The renilla activity of the psiCheck-miR-7 (column 2) was suppressed about 80% by transfection of miR-7 (column 3), but not scrambled miR-7 (not shown). However, transfection of *Cdr1as* (column 4) significantly rescued the inhibitory effect of miR-7 on renilla activity. **(b)** Likewise, the renilla activity of the psiCheck-CiRS-7 (column 2) was also suppressed about 90% by transfection of miR-7 (column 3), but not scrambled miR-7 (not shown). However, transfection of *Cdr1as* (column 4) significantly rescued the inhibitory effect of miR-7 on renilla activity. Luciferase activity, as the corresponding gene is included in the same vector, was served as an inner control and measured by using a Microplate Luminometer (Berthold Technologies, Germany).  $n = 3$ , Mean  $\pm$  SEM, representing three independent experiments in triplicates. \*\*,  $P < 0.01$

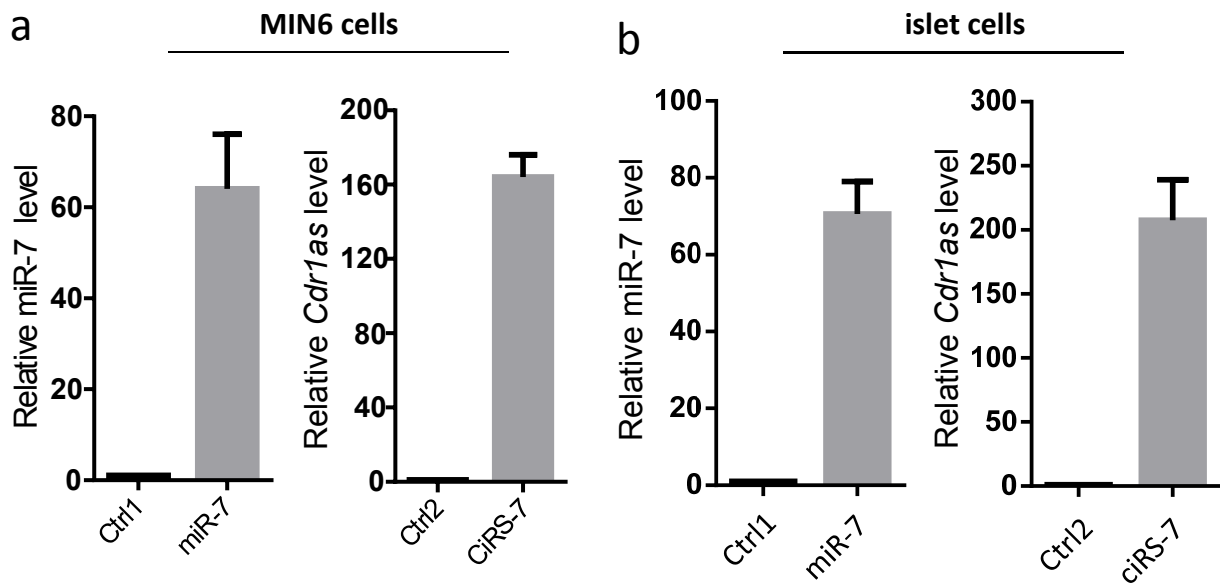

**Supplementary Fig. 2** – Validation of expression miR-7 and *Cdr1as* expression in MIN6 cells (**a**) and islet cells (**b**) by transfecting each corresponding plasmid (miRVec-miR-7 or pCDNA3-ciRS-7) for 48, and compared with controls (see details in Materials and Methods). Experiments were independently performed for three times in triplicates.

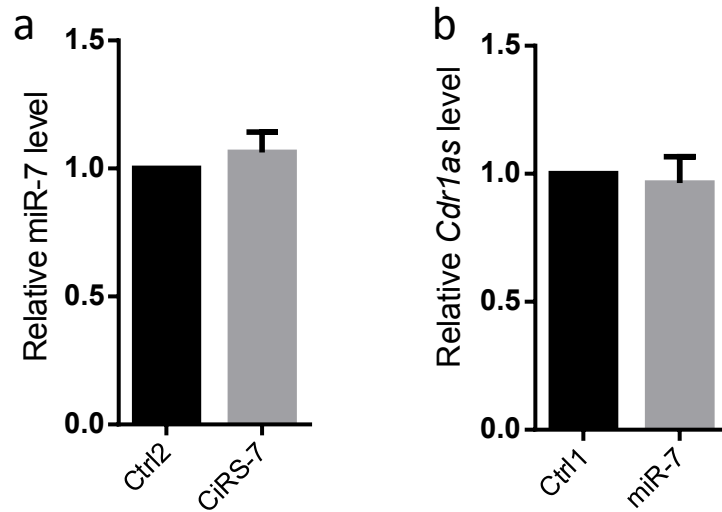

**Supplementary Fig. 3** Quantification of miR-7 (a) or *Cdr1as* level (b) levels derived from transfections with pCDNA3-ciRS-7 along with plasmids expressing miR-7 (miRVec-miR-7). Experiments were independently performed three time in triplicates.

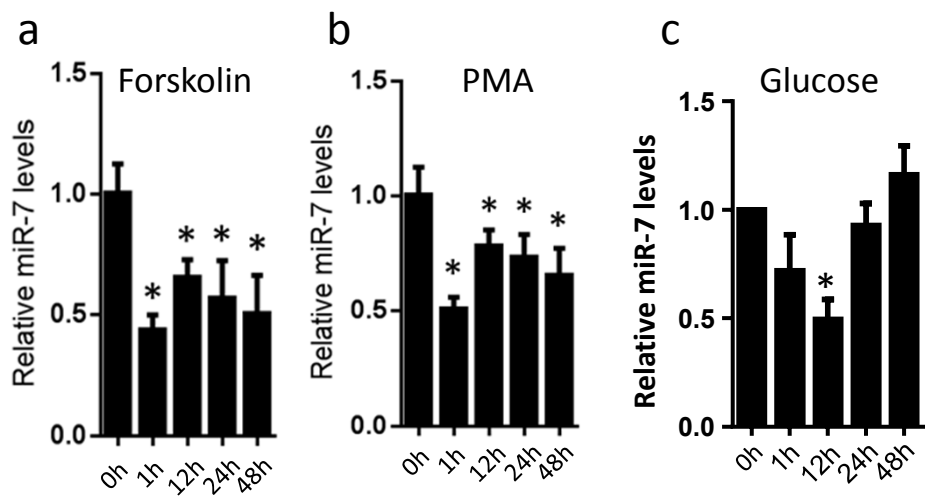

**Supplementary Fig. 4** miR-7 expression responding to forskolin, PMA and glucose. (a) miR-7 expression in islets treated by forskolin (10  $\mu$ M). (b) PMA (1  $\mu$ M) stimulated miR-7 expression in islets. (c) Effect of glucose on miR-7 expression in islets.  $n = 3$ , \*,  $P < 0.05$ ; \*\*,  $P < 0.01$ .

Supplementary Table 1. Primers used for quantitative real-time PCR

| <b>Primer name</b> | <b>Forward primer (5'-3')</b> | <b>Reverse primer (5'-3')</b> |
|--------------------|-------------------------------|-------------------------------|
| miR-7              | TGGAAGACTAGTGATTTTGTGT        | Universal primer(Qiagen)      |
| mus-ciRS-7         | GTGTCTCCAGTGTATCGGCG          | TACTGGCACCCTGGAAACC           |
| Mus-cdr1           | TGGAAGATCACGATTGTCTGGA        | GGTGCCAGTACCAAGGTCTTC         |
| Pax6               | GCGGAGTTATGATACCTACACC        | GAAATGAGTCCTGTTGAAGTGG        |
| WT-Myrip           | GCaagcttCAGGGCAGGGGCTGAAATAA  | ACACTGGTAGCACAAGGCAtgatcaGC   |
| Mut-Myrip          | TGTGaCaagCTATGATGCTCCT        | ATAGcttGtCACAAGGACCCCC        |
| Q-Myrip            | TCGAAGCATCTCCGTGACC           | GGTCAAGGCACTGTCGTGTA          |
| GAPDH              | GTCGGTGTGAACGGATTTG           | GAATTTGCCGTGAGTGGAG           |
| Insulin1           | AAGCAGGTCATTGTTTCAACA         | TTGGGTGTGTAGAAGAAGCC          |
| Insulin2           | GCGTGGCTTCTTCTACACACC         | CCAGTGCCAAGGTCTGAAGG          |
